# Supplementary material
Source: PubMed Central journal article supplement (PMC449741)
Supplement: JCI0416861sf1.pdf [file JCI0416861sf1.pdf]

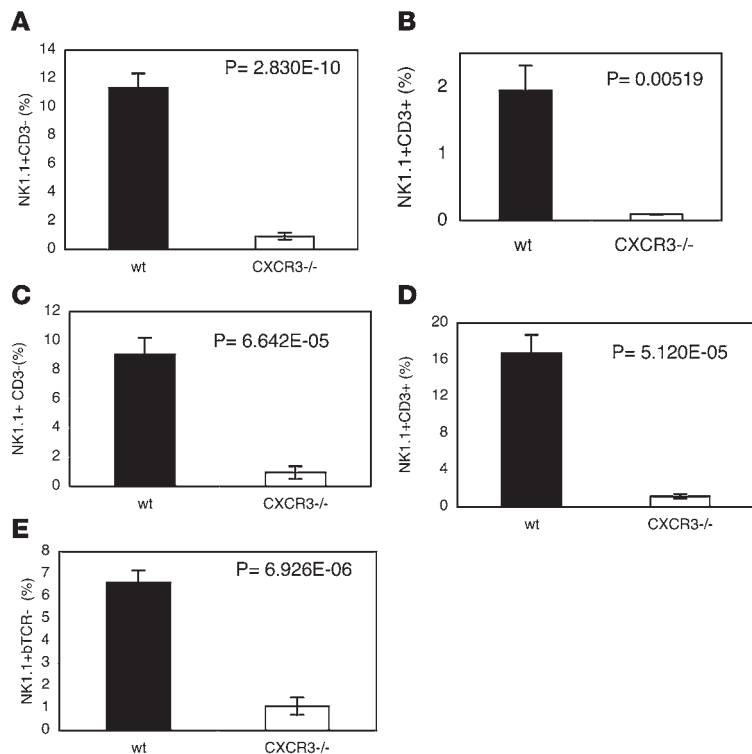

**Figure S1**

NK and NKT cell deficiency in CXCR3<sup>-/-</sup> mice. FACS analysis of NK cells from lung, liver, and peripheral blood using specific Ab to the NK cell marker, NK1.1, and T cell marker, CD3. **(A)** Single cell homogenates from unchallenged lungs of WT C57Bl/6 ( $n = 23$ ) and CXCR3<sup>-/-</sup> ( $n = 19$ ) mice were stained with NK1.1 and anti-CD3e and were subject to flow-cytometric analysis. Analysis was performed on lymphocyte-gated events. The percentages of NK1.1+CD3<sup>-</sup> populations are indicated.  $P = 2.83007E-06$ . **(B)** FACS analysis NK T cells from unchallenged lungs of WT C57Bl/6 ( $n = 11$ ). CXCR3<sup>-/-</sup> ( $n = 7$ ) mice were stained with NK1.1 and anti-CD3e. The percentages of NK1.1+CD3<sup>+</sup> populations are indicated.  $P = 0.00519$ . **(C)** FACS analysis of NK cells from liver. The percentages of NK1.1+CD3<sup>-</sup> populations are indicated.  $n = 8$ ;  $P = 6.642E-05$ . **(D)** FACS analysis of NK T cells from liver. The percentages of NK1.1+CD3<sup>+</sup> populations are indicated.  $n = 8$ ;  $P = 5.120E-05$ . **(E)** FACS analysis of NK cells from peripheral blood. The percentages of NK1.1+βTCR<sup>-</sup> population are indicated.  $n = 7$ ;  $P = 6.926E-06$ .
